# Supplementary material
Source: Springer Nature journal article supplement (https://www.springermedizin.de/resource/supplementary/13075_2009_2795_MOESM4_ESM.pdf/9692902)

**A**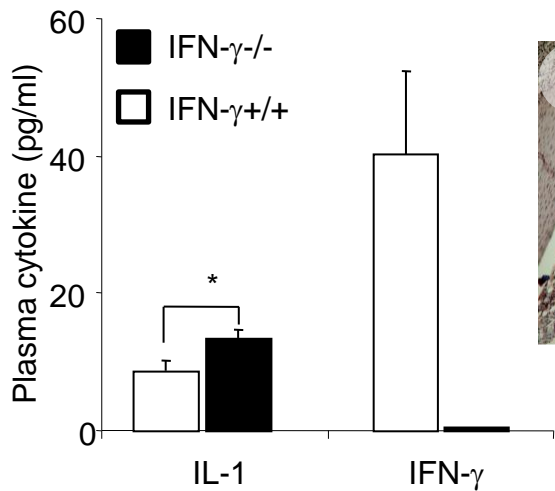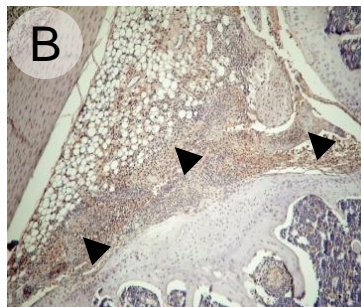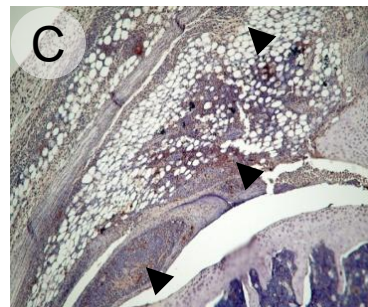**D**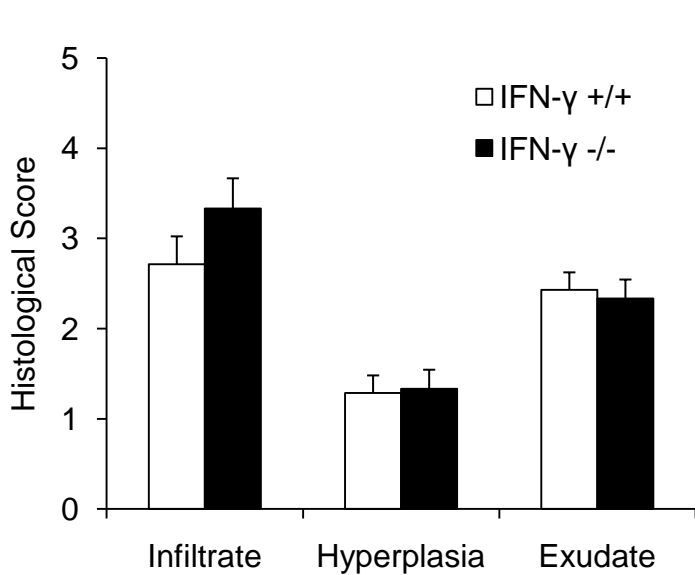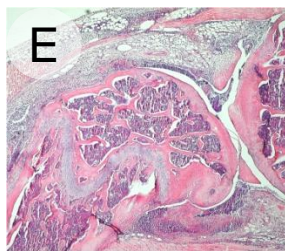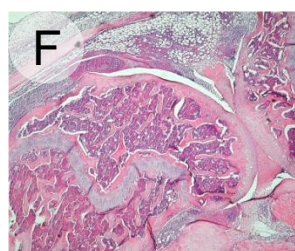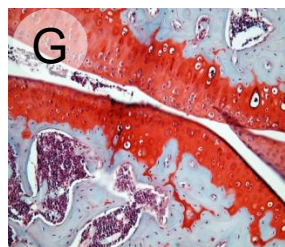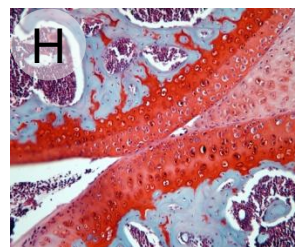

Supplement: MOESM4 [file 9692902]
